# Supplementary material
Source: PubMed Central journal article supplement (PMC6381829)
Supplement: NIHMS1005313-supplement-Supplement.pdf [file NIHMS1005313-supplement-Supplement.pdf]

**\*\*\* SUPPLEMENTAL MATERIAL\*\*\***

**Complementary Value of Cardiac MRI and PET/CT in the  
Assessment of Cardiac Sarcoidosis**

Tomas Vita, David R. Okada, Mahdi Veillet-Chowdhury, Paco Bravo, Erin Mullins, Edward Hulten, Mukta Agrawal, Rachna Madan, Viviany R. Taqueti, Michael Steigner, Hicham Skali, Raymond Y. Kwong, Garrick Stewart, Sharmila Dorbala, Marcelo F. Di Carli and Ron Blankstein.

**Supplemental Methods:**

**CMR Imaging Acquisition**

All CMR images were acquired on a 3.0-T system (Tim Trio, Siemens, Erlangen, Germany), with electrocardiographic gating and breath holding. The CMR protocol consisted of cine steady-state free-precession imaging (TR, 3.4 ms; TE, 1.2 ms; in-plane spatial resolution, 1.6-2mm) for assessing left ventricular (LV) function. For the calculation of LV function, the endocardial and epicardial borders of the LV myocardium were manually traced on successive short-axis cine images at end-diastole and systole. All patients underwent late gadolinium enhancement (LGE) imaging using inversion recovery gradient recall echo (TR, 4.8 ms; TE, 1.3 ms; inversion time, 200 to 300 ms) to detect focal myocardial fibrosis. LGE imaging was performed 10 to 15 min after administration of 0.15-mmol/kg dose of gadolinium diethylenetriamine pentaacetic acid (Magnevist, Bayer HealthCare Pharmaceuticals Inc., Wayne, NJ) or gadobenate dimeglumine (Multihance, Bracco Diagnostic, Princeton, NJ). LGE images were obtained in 8 to 14 matching short-axis (8 mm thick with no gap) and 3 long-axis planes.

## **Nuclear Imaging Acquisition**

Rest myocardial perfusion images were obtained first following the intravenous administration of  $^{82}\text{Rb}$  (~50 mCi) or  $^{13}\text{N}$ -ammonia (~20 mCi) and PET/CT (Discovery RX or DSTE Light Speed 64, GE Healthcare, Milwaukee, WI), or  $^{99\text{m}}\text{Tc}$ -sestamibi (~20 mCi) and SPECT/CT (Symbia T6, Siemens Healthcare, Hoffman Estates, Chicago, IL). After perfusion imaging, 10-12 mCi of  $^{18}\text{F}$ -fluorodeoxyglucose (FDG) was injected intravenously. After a 90-minute uptake period, dedicated cardiac and whole body FDG PET/CT scans were performed. Whole body images were obtained from the base of the skull to mid-thigh.

All patients were instructed to follow a high fat, very low carbohydrate diet (at least 2 meals) followed by a fast of at least 4 hours prior to the test in order to shift normal myocardial metabolism to primary fatty acid utilization and, therefore, suppress the uptake of FDG by normal myocardium.<sup>1</sup> The rationale, methods, and success of this patient preparation protocol have been previously described in detail<sup>1,2</sup>.

Rest perfusion images were classified as normal or abnormal. Perfusion defects were analyzed for each of the 17 myocardial segments and categorized as: none, mild, moderate, or severe<sup>3</sup>.

Cases of non-specific FDG uptake were considered probably normal when there was diffuse and homogenous FDG uptake of the entire myocardium<sup>1,4,5</sup> or the lateral wall<sup>6</sup>. In contrast, when heterogeneous uptake or focal on diffuse uptake was present, the pattern of FDG was categorized as abnormal.

### **Clinical follow-up and event adjudication.**

Multiple VTs in one patient were counted as one event. If a patient had multiple VTs or VT followed by death, only the first event was used for the time to event analysis. Vital status and VT were ascertained by medical record review. Subjects without ICD did not have routine electrocardiographic monitoring as this is not done in our center as part of standard of care. Mailed patient questionnaires and scripted phone interviews were used when electronic medical record was insufficient. Time to event was measured from the date of the first imaging study performed. Event adjudications were performed by 2 cardiologists. In case of discrepancy a third physician was consulted.

Ventricular tachycardia was defined as 3 or more consecutive complexes in duration emanating from the ventricles at a rate  $>100$  bpm, which lasts more than 30seconds or requires termination due to hemodynamic compromise in less than 30 seconds<sup>7</sup>

### **Statistical Analysis**

Study data were collected and managed using REDCap (Research Electronic Data Capture) electronic data capture tools housed at Brigham and Women's Hospital<sup>8</sup>. Annualized event rates are expressed as the number of patients having events (VT or death) as a proportion of the number of patients at risk divided by the number of patient-years follow-up..

### **Supplemental Results:**

#### ***Baseline Characteristics***

When considering the sequence of imaging testing used in clinical care, 84 patients had CMR first, 12 patients had PET first, and 11 had combined same day testing.

## ***CMR Findings***

Notably, the concordance between CMR and perfusion defects on PET was only modest. On a per patient level, there were 65 subjects who had concordant results, while 37 had positive LGE with no perfusion defect and 5 had perfusion defect with no LGE.

## **Pattern of LGE on CMR**

There were 3 patients who had MRI findings consistent with ARVC, while 2 patients had an MRI pattern consistent with amyloidosis. An infarct like pattern was present in 7 subjects.

## **Supplemental Discussion:**

While not the primary focus of our paper, we observed a high event rate across our population of patients with suspected CS. However, our high event rate was consistent with a recent meta analysis which showed that patients with LGE have an annual rate of 9.5% of death or ventricular arrhythmias<sup>9</sup>. Our event rate is also consistent with prior studies such as, Schuller et al<sup>10</sup> who reported appropriate ICD therapies in 36 (32%) of 112 patients with CS who underwent ICD implantation and were followed for a mean of 29 months or Betensky et al<sup>11</sup> who reported ICD therapies in 17 (38%) of 45 patients with CS followed over a median of 2 years. Our higher event rate could also be due to referral bias, as our center is a quaternary care center with frequent referrals of patients with advanced heart failure and arrhythmias, as reflected by our high proportion of individuals presenting severe LV dysfunction (23%), or VT (35%). Thus, as is often the case for patients referred for an evaluation of CS, even when patients did not have CS, they often had other alternative diagnosis that adversely impacted their prognosis. Because of the high event rate present in our study, and the fact that there were very few patients with

normal CMR or PET results, our study was underpowered to detect any difference in outcomes across the various sub-groups examined.

### **Supplemental References:**

1. Blankstein R, Osborne M, Naya M, Waller A, Kim CK, Murthy VL, Kazemian P, Kwong RY, Tokuda M, Skali H, Padera R, Hainer J, Stevenson WG, Dorbala S and Di Carli MF. Cardiac positron emission tomography enhances prognostic assessments of patients with suspected cardiac sarcoidosis. *J Am Coll Cardiol*. 2014;63:329-36.
2. Osborne MT, Hulten EA, Murthy VL, Skali H, Taqueti VR, Dorbala S, DiCarli MF and Blankstein R. Patient preparation for cardiac fluorine-18 fluorodeoxyglucose positron emission tomography imaging of inflammation. *J Nucl Cardiol*. 2017;24:86-99.
3. Tilkemeier PL, Wackers FJ and Quality Assurance Committee of the American Society of Nuclear C. Myocardial perfusion planar imaging. *J Nucl Cardiol*. 2006;13:e91-6.
4. Ishimaru S, Tsujino I, Takei T, Tsukamoto E, Sakaue S, Kamigaki M, Ito N, Ohira H, Ikeda D, Tamaki N and Nishimura M. Focal uptake on 18F-fluoro-2-deoxyglucose positron emission tomography images indicates cardiac involvement of sarcoidosis. *Eur Heart J*. 2005;26:1538-43.
5. Aggarwal NR, Snipelisky D, Young PM, Gersh BJ, Cooper LT and Chareonthaitawee P. Advances in imaging for diagnosis and management of cardiac sarcoidosis. *Eur Heart J Cardiovasc Imaging*. 2015;16:949-58.
6. Maurer AH, Burshteyn M, Adler LP, Gaughan JP and Steiner RM. Variable cardiac 18FDG patterns seen in oncologic positron emission tomography computed tomography: importance for differentiating normal physiology from cardiac and paracardiac disease. *J Thorac Imaging*. 2012;27:263-8.
7. Buxton AE, Calkins H, Callans DJ, DiMarco JP, Fisher JD, Greene HL, Haines DE, Hayes DL, Heidenreich PA, Miller JM, Poppas A, Prystowsky EN, Schoenfeld MH, Zimetbaum PJ, Heidenreich PA, Goff DC, Grover FL, Malenka DJ, Peterson ED, Radford MJ, Redberg RF, American College of C and American Heart Association Task Force on Clinical Data S. ACC/AHA/HRS 2006 key data elements and definitions for electrophysiological studies and procedures: a report of the American College of Cardiology/American Heart Association Task Force on Clinical Data Standards (ACC/AHA/HRS Writing Committee to Develop Data Standards on Electrophysiology). *J Am Coll Cardiol*. 2006;48:2360-96.
8. Harris PA, Taylor R, Thielke R, Payne J, Gonzalez N and Conde JG. Research electronic data capture (REDCap)--a metadata-driven methodology and workflow process for providing translational research informatics support. *J Biomed Inform*. 2009;42:377-81.
9. Hulten E, Agarwal V, Cahill M, Cole G, Vita T, Parrish S, Bittencourt MS, Murthy VL, Kwong R, Di Carli MF and Blankstein R. Presence of Late Gadolinium Enhancement by Cardiac Magnetic Resonance Among Patients With Suspected Cardiac Sarcoidosis Is Associated With Adverse Cardiovascular Prognosis: A Systematic Review and Meta-Analysis. *Circ Cardiovasc Imaging*. 2016;9:e005001.

10. Schuller JL, Zipse M, Crawford T, Bogun F, Beshai J, Patel AR, Sweiss NJ, Nguyen DT, Aleong RG, Varosy PD, Weinberger HD and Sauer WH. Implantable cardioverter defibrillator therapy in patients with cardiac sarcoidosis. *J Cardiovasc Electrophysiol.* 2012;23:925-9.
11. Betensky BP, Tschabrunn CM, Zado ES, Goldberg LR, Marchlinski FE, Garcia FC and Cooper JM. Long-term follow-up of patients with cardiac sarcoidosis and implantable cardioverter-defibrillators. *Heart Rhythm.* 2012;9:884-91.

**Supplemental Table 1. Absolute number of events and annual event rate per methodology and likelihood.**

| <b>Modality and Likelihood</b> | <b>Ventricular Tachycardia</b> | <b>Death</b> | <b>Absolute Event Rate</b> | <b>Annual Event Rate</b> |
|--------------------------------|--------------------------------|--------------|----------------------------|--------------------------|
| <b>Cardiac MRI</b>             |                                |              |                            |                          |
| No sarcoidosis (<10%)          | 1                              | 0            | 1 (7%)                     | 2.3                      |
| Possible (<50%)                | 7                              | 1            | 8 (23%)                    | 12.8                     |
| Probable (50-90%)              | 8                              | 3            | 11 (32%)                   | 13.5                     |
| Highly Probable (>90%)         | 4                              | 3            | 7 (30%)                    | 12.6                     |
| <b>FDG-PET</b>                 |                                |              |                            |                          |
| No sarcoidosis (<10%)          | 3                              | 0            | 3 (17%)                    | 6.5                      |
| Possible (<50%)                | 8                              | 1            | 9 (31%)                    | 13.1                     |
| Probable (50-90%)              | 4                              | 3            | 7 (19%)                    | 10.0                     |
| Highly Probable (>90%)         | 5                              | 3            | 8 (35%)                    | 14.0                     |
| <b>Combined Images</b>         |                                |              |                            |                          |
| No sarcoidosis (<10%)          | 2                              | 0            | 2 (19%)                    | 5.5                      |
| Possible (<50%)                | 7                              | 0            | 7 (27%)                    | 12.2                     |
| Probable (50-90%)              | 5                              | 3            | 8 (19%)                    | 10.0                     |
| Highly Probable (>90%)         | 6                              | 4            | 10 (34%)                   | 14.5                     |

**Supplemental Table 2. Annual Event Rate Stratified by the presence or absence of LGE on CMR and FDG by PET.**

| <b>Cardiac PET</b> | <b>Cardiac MRI</b> |                |
|--------------------|--------------------|----------------|
|                    | <b>LGE (+)</b>     | <b>LGE (-)</b> |
| <b>FDG (+)</b>     | 11.8               | 6.1            |
| <b>FDG (-)</b>     | 13                 | 4.5            |
